# Supplementary material
Source: HighWire-hosted journal article supplement (https://jnm.snmjournals.org/highwire/filestream/95584/field_highwire_adjunct_files/0/228627_Supplemental_Data.pdf)
Supplement: 228627_Supplemental_Data.pdf [file 228627_Supplemental_Data.pdf]

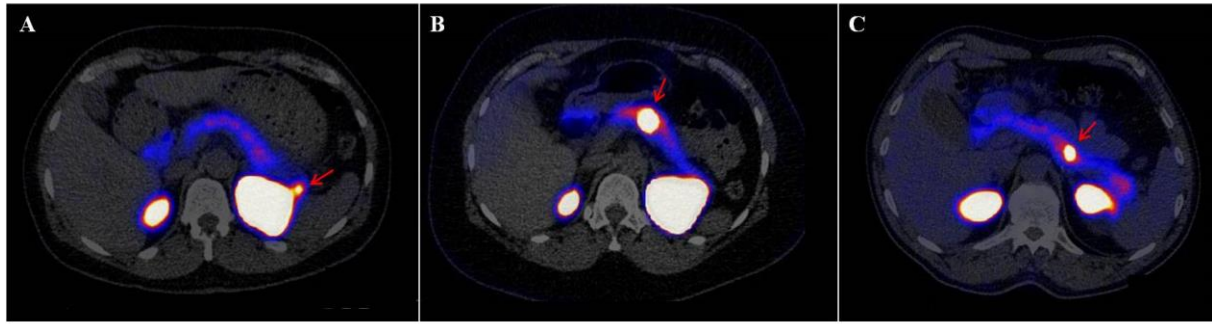

**Supplemental figure 1:** Transversal fused PET/CT images of the abdomen showing the detected insulinomas in patient 2 (A), patient 3 (B) and patient 4 (C). Lesions are indicated with red arrows.
